# Supplementary material for: Leucoverdazyls as Novel Potent Inhibitors of Enterovirus Replication
Source: MDPI journal article supplement (doi:10.3390/pathogens13050410), 2024-05-15
Supplement: s1 [file s1]

# Supplementary material

Table S1 CVB3 specific primers used for PCR fragment preparation and Sanger sequencing

| Primer name | Sequence (5'-3')         |
|-------------|--------------------------|
| C1-S        | TAAAACAGCCTGTGGGTTGATC   |
| C1-A        | GTAGGTTGATCCATTGGTGG     |
| C2-S        | TGGTGTATAATGCAGGCATGG    |
| C2-A        | CCCTATAGCGGCTGTTATCG     |
| C3-S        | CACTCCTTTCACTTCGCAGG     |
| C3-A        | CCCTGTAGTTCCCCACATAC     |
| C4-S        | TGTCAACGCTGGAAGCACG      |
| C4-A        | CCTCACCACAATTACTAAGGC    |
| C5-S        | GGGTCAAGACTCCATCTTAG     |
| C5-A        | GTATCCGTCGAAGTGATCTG     |
| C6-S        | CAGACCCAGATCACTTCGAC     |
| C6-A        | CACCATTGGTAGGTTCAAGC     |
| C7-S        | TTGCACTGGGTATCAAGAAGAG   |
| C7-A        | AATAATCCGCACCGAATGCG     |
| R 494 513   | ACACTGCCCTCTGGCTTGA      |
| F 1045 1064 | GTGGGCTATGGAGTATGGC      |
| R 1110 1130 | ATGTGGCAACGTCTGGTTGG     |
| R 1937 1959 | GATCTCACAGGTATCTGGTATG   |
| F 1961 1982 | ATGAAGGATCTGGAACGCAAG    |
| R 2897 2919 | GAATCAACTTTATCTGGTACAG   |
| F 3543 3565 | GTAGAGGTCCAAGAGAGTGAATAC |
| F 5293 5314 | CAAGGTGCTTATACAGGAGTG    |
| F 5824 5844 | GGCAAGGTACTGGGTATCC      |
| R 5385 5366 | ACGGCGAACTCAAAGGCAG      |
| R 5974 5953 | ACTTGGTGTGTTGATGACTGG    |
| F 6867 6887 | GGACCAATTCAGGATGATCG     |
| R 6888 6868 | GCGATCATCCTGAATTGGTC     |
